# Supplementary material
Source: PubMed Central journal article supplement (PMC5675227)
Supplement: SupplementalTable.pdf [file SupplementalTable.pdf]

**Supplemental Table 1. Multivariable regression analyses models between urinary phthalate and ED<sup>B</sup> in total population and stratified by race-ethnicity in NHANES 2001-2004**

| <b>Mono-n-butyl phthalate (MBP)</b>     | Median (25 <sup>th</sup> and 75 <sup>th</sup> percentile) for continuous variable and range for quartiles | ED+/ED- | OR    | 95% CI    | <i>P</i> -value <sup>†</sup> | <i>P</i> -trend <sup>†</sup> |
|-----------------------------------------|-----------------------------------------------------------------------------------------------------------|---------|-------|-----------|------------------------------|------------------------------|
| Continuous Quartiles                    | 13.38(8.63-22.43)                                                                                         | 356/993 | 1.04  | 0.86-1.26 | 0.673                        |                              |
| 1 <sup>st</sup> Quartile                | 0.01-8.63                                                                                                 | 78/260  | -Ref- |           |                              |                              |
| 2 <sup>nd</sup> Quartile                | 8.64-13.38                                                                                                | 88/249  | 1.26  | 0.79-2.01 | 0.324                        |                              |
| 3 <sup>rd</sup> Quartile                | 13.39-22.42                                                                                               | 82/255  | 1.09  | 0.67-1.76 | 0.725                        | 0.43                         |
| 4 <sup>th</sup> Quartile                | 22.44-4150                                                                                                | 108/229 | 1.31  | 0.78-2.21 | 0.299                        |                              |
| <b>Mexican Americans</b>                |                                                                                                           |         |       |           |                              |                              |
| Continuous Quartiles                    | 14.18(9.24-22.38)                                                                                         | 70/197  | 0.45  | 0.31-0.66 | <0.001                       |                              |
| 1 <sup>st</sup> Quartile                | 0.17-9.25                                                                                                 | 21/46   | -Ref- |           |                              |                              |
| 2 <sup>nd</sup> Quartile                | 9.26-14.18                                                                                                | 21/46   | 0.71  | 0.33-1.50 | 0.35                         | 0.002                        |
| 3 <sup>rd</sup> Quartile                | 14.23-22.38                                                                                               | 12/55   | 0.35  | 0.11-1.09 | 0.07                         |                              |
| 4 <sup>th</sup> Quartile                | 22.44-229.63                                                                                              | 16/50   | 0.26  | 0.12-0.54 | 0.001                        |                              |
| <b>Non-Hispanic Whites</b>              |                                                                                                           |         |       |           |                              |                              |
| Continuous Quartiles                    | 15.43(10.66-22.82)                                                                                        | 205/522 | 1.00  | 0.83-1.20 | 0.993                        |                              |
| 1 <sup>st</sup> Quartile                | 0.52-8.26                                                                                                 | 43/139  | -Ref- |           |                              |                              |
| 2 <sup>nd</sup> Quartile                | 8.31-12.72                                                                                                | 47/135  | 1.31  | 0.72-2.42 | 0.37                         | 0.715                        |
| 3 <sup>rd</sup> Quartile                | 12.75-21.91                                                                                               | 50/132  | 1.06  | 0.51-2.19 | 0.87                         |                              |
| 4 <sup>th</sup> Quartile                | 21.93-4150                                                                                                | 65/116  | 1.21  | 0.65-2.26 | 0.53                         |                              |
| <b>Non-Hispanic Blacks</b>              |                                                                                                           |         |       |           |                              |                              |
| Continuous Quartiles                    | 14.29(7.62-23.85)                                                                                         | 57/207  | 1.43  | 0.90-2.27 | 0.129                        |                              |
| 1 <sup>st</sup> Quartile                | 0.09-9.32                                                                                                 | 10/56   | -Ref- |           |                              |                              |
| 2 <sup>nd</sup> Quartile                | 9.34-13.77                                                                                                | 13/53   | 1.96  | 0.44-8.77 | 0.36                         | 0.21                         |
| 3 <sup>rd</sup> Quartile                | 13.79-24.49                                                                                               | 15/51   | 1.61  | 0.51-5.10 | 0.40                         |                              |
| 4 <sup>th</sup> Quartile                | 24.58-1563.28                                                                                             | 19/47   | 2.25  | 0.71-7.16 | 0.16                         |                              |
| <b>Mono-cyclohexyl phthalate (MCHP)</b> |                                                                                                           |         |       |           |                              |                              |
| Continuous Quartiles                    | 0.26(0.18-0.44)                                                                                           | 356/993 | 0.98  | 0.57-1.67 | 0.936                        |                              |
| 1 <sup>st</sup> Quartile                | 0.04-0.18                                                                                                 | 65/275  | -Ref- |           |                              |                              |
| 2 <sup>nd</sup> Quartile                | 0.19-0.26                                                                                                 | 75/262  | 1.32  | 0.76-2.29 | 0.314                        | 0.74                         |
| 3 <sup>rd</sup> Quartile                | 0.27-0.44                                                                                                 | 108/227 | 1.06  | 0.58-1.94 | 0.833                        |                              |
| 4 <sup>th</sup> Quartile                | 0.45-18.93                                                                                                | 108/229 | 0.93  | 0.45-1.94 | 0.846                        |                              |
| <b>Mexican Americans</b>                |                                                                                                           |         |       |           |                              |                              |
| Continuous Quartiles                    | 0.28(0.19-0.44)                                                                                           | 70/197  | 1.22  | 0.29-5.08 | 0.777                        |                              |
| 1 <sup>st</sup> Quartile                | 0.04-0.18                                                                                                 | 17/52   | -Ref- |           |                              |                              |
| 2 <sup>nd</sup> Quartile                | 0.19-0.28                                                                                                 | 11/56   | 0.42  | 0.14-1.27 | 0.119                        | 0.99                         |
| 3 <sup>rd</sup> Quartile                | 0.29-0.43                                                                                                 | 18/47   | 0.78  | 0.22-2.80 | 0.695                        |                              |
| 4 <sup>th</sup> Quartile                | 0.44-3.72                                                                                                 | 24/42   | 0.98  | 0.18-5.20 | 0.982                        |                              |
| <b>Non-Hispanic Whites</b>              |                                                                                                           |         |       |           |                              |                              |

|                                              |                      |         |       |            |       |       |
|----------------------------------------------|----------------------|---------|-------|------------|-------|-------|
| Continuous Quartiles                         | 0.30(0.20-0.46)      | 205/522 | 1.02  | 0.44-2.35  | 0.963 |       |
| 1 <sup>st</sup> Quartile                     | 0.05-0.19            | 41/142  | -Ref- |            |       |       |
| 2 <sup>nd</sup> Quartile                     | 0.20-0.28            | 46/135  | 1.09  | 0.61-1.95  | 0.771 | 0.93  |
| 3 <sup>rd</sup> Quartile                     | 0.29-0.47            | 66/118  | 1.11  | 0.56-2.18  | 0.759 |       |
| 4 <sup>th</sup> Quartile                     | 0.48-4.73            | 52/127  | 1.02  | 0.32-3.26  | 0.969 |       |
| <b>Non-Hispanic Blacks</b>                   |                      |         |       |            |       |       |
| Continuous Quartiles                         | 0.33(0.19-0.50)      | 57/207  | 1.39  | 0.35-5.50  | 0.63  |       |
| 1 <sup>st</sup> Quartile                     | 0.04-0.14            | 10/56   | -Ref- |            |       |       |
| 2 <sup>nd</sup> Quartile                     | 0.15-0.20            | 9/58    | 0.44  | 0.07-2.61  | 0.35  | 0.80  |
| 3 <sup>rd</sup> Quartile                     | 0.21-0.33            | 13/52   | 0.99  | 0.13-7.55  | 0.99  |       |
| 4 <sup>th</sup> Quartile                     | 0.34-18.93           | 25/41   | 1.08  | 0.07-16.37 | 0.954 |       |
| <b>Mono-ethyl phthalate (MEP)</b>            |                      |         |       |            |       |       |
| Continuous Quartiles                         | 107.14(39.6-310.2)   | 356/993 | 1.08  | 0.91-1.30  | 0.366 |       |
| 1 <sup>st</sup> Quartile                     | 0.25-39.6            | 89/249  | -Ref- |            |       |       |
| 2 <sup>nd</sup> Quartile                     | 39.7-107.1           | 80/257  | 0.90  | 0.50-1.61  | 0.712 | 0.239 |
| 3 <sup>rd</sup> Quartile                     | 107.7-310.2          | 90/247  | 1.11  | 0.64-1.90  | 0.705 |       |
| 4 <sup>th</sup> Quartile                     | 310.8-20316.25       | 97/240  | 1.46  | 0.70-3.06  | 0.302 |       |
| <b>Mexican Americans</b>                     |                      |         |       |            |       |       |
| Continuous Quartiles                         | 138.12(51.91-370.39) | 70/197  | 0.90  | 0.70-1.16  | 0.397 |       |
| 1 <sup>st</sup> Quartile                     | 1.81-51.90           | 17/50   | -Ref- |            |       |       |
| 2 <sup>nd</sup> Quartile                     | 52.8-138.12          | 18/49   | 1.26  | 0.35-4.54  | 0.709 | 0.671 |
| 3 <sup>rd</sup> Quartile                     | 145.93-370.93        | 19/48   | 1.16  | 0.38-3.45  | 0.785 |       |
| 4 <sup>th</sup> Quartile                     | 376.10-20136.25      | 16/50   | 0.78  | 0.23-2.73  | 0.692 |       |
| <b>Non-Hispanic Whites</b>                   |                      |         |       |            |       |       |
| Continuous Quartiles                         | 89.57(34.76-269.10)  | 205/522 | 1.09  | 0.87-1.35  | 0.441 |       |
| 1 <sup>st</sup> Quartile                     | 0.41-34.76           | 48/134  | -Ref- |            |       |       |
| 2 <sup>nd</sup> Quartile                     | 34.91-89.57          | 41/141  | 0.74  | 0.34-1.60  | 0.431 | 0.231 |
| 3 <sup>rd</sup> Quartile                     | 90.83-269.10         | 58/124  | 1.16  | 0.64-2.13  | 0.614 |       |
| 4 <sup>th</sup> Quartile                     | 273.07-14319.41      | 58/123  | 1.38  | 0.62-3.07  | 0.414 |       |
| <b>Non-Hispanic Blacks</b>                   |                      |         |       |            |       |       |
| Continuous Quartiles                         | 127.52(58.16-359.79) | 57/207  | 0.94  | 0.65-1.36  | 0.718 |       |
| 1 <sup>st</sup> Quartile                     | 0.25-57.51           | 15/51   | -Ref- |            |       |       |
| 2 <sup>nd</sup> Quartile                     | 58.81-126.78         | 15/51   | 1.59  | 0.43-5.91  | 0.472 | 0.432 |
| 3 <sup>rd</sup> Quartile                     | 128.33-351.06        | 12/54   | 1.40  | 0.38-5.14  | 0.600 |       |
| 4 <sup>th</sup> Quartile                     | 368.50-9921.51       | 15/51   | 0.58  | 0.12-2.69  | 0.468 |       |
| <b>Mono-(2-ethyl)-hexyl phthalate (MEHP)</b> |                      |         |       |            |       |       |
| Continuous Quartiles                         | 2.35(1.06-5.38)      | 356/993 | 1.07  | 0.88-1.31  | 0.478 |       |
| 1 <sup>st</sup> Quartile                     | 0.09-1.06            | 107/231 | -Ref- |            |       |       |
| 2 <sup>nd</sup> Quartile                     | 1.07-2.36            | 95/242  | 0.80  | 0.44-1.45  | 0.452 | 0.879 |
| 3 <sup>rd</sup> Quartile                     | 2.37-5.38            | 79/258  | 0.81  | 0.48-1.38  | 0.429 |       |
| 4 <sup>th</sup> Quartile                     | 5.40-527.94          | 75/262  | 0.98  | 0.58-1.66  | 0.936 |       |

|                                       |                 |         |       |             |       |       |
|---------------------------------------|-----------------|---------|-------|-------------|-------|-------|
| <b>Mexican Americans</b>              |                 |         |       |             |       |       |
| Continuous Quartiles                  | 2.63(0.98-5.48) | 70/197  | 0.75  | 0.49-1.14   | 0.172 |       |
| 1 <sup>st</sup> Quartile              | 0.23-0.98       | 23/44   | -Ref- |             |       |       |
| 2 <sup>nd</sup> Quartile              | 1.00-2.63       | 16/51   | 0.52  | 0.12-2.25   | 0.37  | 0.337 |
| 3 <sup>rd</sup> Quartile              | 2.65-5.48       | 17/50   | 0.55  | 0.14-2.10   | 0.37  |       |
| 4 <sup>th</sup> Quartile              | 5.50-84.81      | 14/52   | 0.54  | 0.17-1.77   | 0.30  |       |
| <b>Non-Hispanic Whites</b>            |                 |         |       |             |       |       |
| Continuous Quartiles                  | 2.07(1.04-5.00) | 205/522 | 1.10  | 0.87-1.40   | 0.413 |       |
| 1 <sup>st</sup> Quartile              | 0.22-1.04       | 57/126  | -Ref- |             |       |       |
| 2 <sup>nd</sup> Quartile              | 1.05-2.06       | 61/120  | 0.87  | 0.40-1.86   | 0.701 | 0.856 |
| 3 <sup>rd</sup> Quartile              | 2.07-5.00       | 45/139  | 0.78  | 0.37-1.66   | 0.512 |       |
| 4 <sup>th</sup> Quartile              | 5.05-214.31     | 42/137  | 1.15  | 0.54-2.43   | 0.712 |       |
| <b>Non-Hispanic Blacks</b>            |                 |         |       |             |       |       |
| Continuous Quartiles                  | 2.80(1.28-6.57) | 57/207  | 0.74  | 0.55-0.98   | 0.041 |       |
| 1 <sup>st</sup> Quartile              | 0.09-1.27       | 18/48   | -Ref- |             |       |       |
| 2 <sup>nd</sup> Quartile              | 1.28-2.78       | 15/51   | 0.82  | 0.15-4.41   | 0.815 | 0.053 |
| 3 <sup>rd</sup> Quartile              | 2.8-6.53        | 15/51   | 0.78  | 0.30-2.04   | 0.598 |       |
| 4 <sup>th</sup> Quartile              | 6.60-230.37     | 9/57    | 0.29  | 0.06-1.38   | 0.115 |       |
| <b>Mono-isononyl phthalate (MiNP)</b> |                 |         |       |             |       |       |
| Continuous Quartiles                  | 0.71(0.50-1.10) | 356/993 | 1.80  | 0.77-4.24   | 0.169 |       |
| 1 <sup>st</sup> Quartile              | 0.12-0.49       | 54/287  | Ref   |             |       |       |
| 2 <sup>nd</sup> Quartile              | 0.50-0.71       | 87/248  | 1.10  | 0.67-1.80   | 0.701 | 0.591 |
| 3 <sup>rd</sup> Quartile              | 0.71-1.10       | 109/229 | 1.65  | 0.82-3.33   | 0.155 |       |
| 4 <sup>th</sup> Quartile              | 1.11-9.68       | 106/229 | 0.92  | 0.35-2.40   | 0.859 |       |
| <b>Mexican Americans</b>              |                 |         |       |             |       |       |
| Continuous Quartiles                  | 0.76(0.54-1.08) | 70/197  | 0.66  | (0.10-4.60) | 0.664 |       |
| 1 <sup>st</sup> Quartile              | 0.16-0.54       | 8/59    | -Ref- |             |       |       |
| 2 <sup>nd</sup> Quartile              | 0.55-0.75       | 20/48   | 1.75  | 0.57-5.35   | 0.315 | 0.516 |
| 3 <sup>rd</sup> Quartile              | 0.76-1.08       | 17/49   | 0.59  | 0.18-2.00   | 0.386 |       |
| 4 <sup>th</sup> Quartile              | 1.09-9.47       | 25/41   | 1.00  | 0.18-5.40   | 0.997 |       |
| <b>Non-Hispanic Whites</b>            |                 |         |       |             |       |       |
| Continuous Quartiles                  | 0.75(0.53-1.21) | 205/522 | 1.97  | 0.57-6.51   | 0.281 |       |
| 1 <sup>st</sup> Quartile              | 0.20-0.52       | 30/153  | -Ref- |             |       |       |
| 2 <sup>nd</sup> Quartile              | 0.53-0.74       | 52/129  | 1.32  | 0.71-2.45   | 0.368 | 0.171 |
| 3 <sup>rd</sup> Quartile              | 0.75-1.21       | 69/114  | 2.70  | 1.24-5.92   | 0.015 |       |
| 4 <sup>th</sup> Quartile              | 1.22-9.68       | 54/126  | 1.41  | 0.44-4.47   | 0.551 |       |
| <b>Non-Hispanic Blacks</b>            |                 |         |       |             |       |       |
| Continuous Quartiles                  | 0.54(0.38-0.83) | 57/207  | 1.27  | 0.29-5.59   | 0.744 |       |
| 1 <sup>st</sup> Quartile              | 0.12-0.37       | 7/59    | -Ref- |             |       |       |
| 2 <sup>nd</sup> Quartile              | 0.38-0.54       | 13/53   | 1.82  | 0.20-16.50  | 0.580 | 0.931 |
| 3 <sup>rd</sup> Quartile              | 0.55-0.83       | 18/49   | 1.94  | 0.21-17.58  | 0.541 |       |

|                                      |                  |         |       |           |       |       |
|--------------------------------------|------------------|---------|-------|-----------|-------|-------|
| 4 <sup>th</sup> Quartile             | 0.84-6.05        | 19/46   | 0.73  | 0.09-5.88 | 0.763 |       |
| <b>Mono-benzyl phthalate (MBzP)</b>  |                  |         |       |           |       |       |
| Continuous Quartiles                 | 7.25(4.10-13.16) | 356/993 | 1.00  | 0.99-1.01 | 0.790 |       |
| 1 <sup>st</sup> Quartile             | 0.02-4.09        | 101/237 | -Ref- |           |       | 0.076 |
| 2 <sup>nd</sup> Quartile             | 4.10-7.25        | 88/249  | 0.85  | 0.53-1.36 | 0.476 |       |
| 3 <sup>rd</sup> Quartile             | 7.28-13.16       | 76/261  | 0.59  | 0.34-1.02 | 0.060 |       |
| 4 <sup>th</sup> Quartile             | 13.17-303.32     | 91/246  | 0.68  | 0.41-1.13 | 0.129 |       |
| <b>Mexican Americans</b>             |                  |         |       |           |       |       |
| Continuous Quartiles                 | 7.20(3.83-12.75) | 70/197  | 0.97  | 0.93-1.01 | 0.140 |       |
| 1 <sup>st</sup> Quartile             | 0.04-3.83        | 21/46   | -Ref- |           |       | 0.029 |
| 2 <sup>nd</sup> Quartile             | 3.86-7.2         | 16/52   | 0.58  | 0.18-1.85 | 0.345 |       |
| 3 <sup>rd</sup> Quartile             | 7.3-12.74        | 19/47   | 0.63  | 0.18-2.16 | 0.450 |       |
| 4 <sup>th</sup> Quartile             | 12.94-160.35     | 14/52   | 0.28  | 0.09-0.70 | 0.010 |       |
| <b>Non-Hispanic Whites</b>           |                  |         |       |           |       |       |
| Continuous Quartiles                 | 7.06(3.90-13.58) | 205/522 | 1.00  | 0.99-1.02 | 0.567 |       |
| 1 <sup>st</sup> Quartile             | 0.10-3.89        | 64/118  | -Ref- |           |       | 0.182 |
| 2 <sup>nd</sup> Quartile             | 3.90-7.05        | 48/134  | 0.76  | 0.44-1.30 | 0.304 |       |
| 3 <sup>rd</sup> Quartile             | 7.06-13.57       | 41/141  | 0.55  | 0.27-1.10 | 0.087 |       |
| 4 <sup>th</sup> Quartile             | 13.62-181.72     | 52/129  | 0.74  | 0.42-1.32 | 0.300 |       |
| <b>Non-Hispanic Blacks</b>           |                  |         |       |           |       |       |
| Continuous Quartiles                 | 8.07(4.69-14.77) | 57/207  | 0.98  | 0.97-1.01 | 0.158 |       |
| 1 <sup>st</sup> Quartile             | 0.02-4.65        | 10/56   | -Ref- |           |       | 0.196 |
| 2 <sup>nd</sup> Quartile             | 4.72-7.98        | 18/48   | 1.56  | 0.57-4.31 | 0.376 |       |
| 3 <sup>rd</sup> Quartile             | 8.15-14.77       | 13/53   | 0.33  | 0.09-1.29 | 0.106 |       |
| 4 <sup>th</sup> Quartile             | 14.78-303.32     | 16/50   | 0.76  | 0.28-2.05 | 0.572 |       |
| <b>Mono-n-methyl phthalate (MMP)</b> |                  |         |       |           |       |       |
| Continuous Quartiles                 | 1.27(0.57-2.50)  | 356/993 | 1.00  | 0.99-1.02 | 0.574 |       |
| 1 <sup>st</sup> Quartile             | 0.04-0.56        | 83/257  | -Ref- |           |       | 0.126 |
| 2 <sup>nd</sup> Quartile             | 0.57-1.27        | 76/259  | 0.73  | 0.44-1.22 | 0.224 |       |
| 3 <sup>rd</sup> Quartile             | 1.28-2.50        | 84/253  | 0.93  | 0.55-1.57 | 0.769 |       |
| 4 <sup>th</sup> Quartile             | 2.51-741.61      | 113/224 | 1.30  | 0.84-2.00 | 0.224 |       |
| <b>Mexican Americans</b>             |                  |         |       |           |       |       |
| Continuous Quartiles                 | 1.28(0.56-2.77)  | 70/197  | 1.00  | 0.99-1.01 | 0.654 |       |
| 1 <sup>st</sup> Quartile             | 0.04-0.55        | 20/47   | -Ref- |           |       | 0.085 |
| 2 <sup>nd</sup> Quartile             | 0.56-1.27        | 16/51   | 0.31  | 0.09-1.10 | 0.070 |       |
| 3 <sup>rd</sup> Quartile             | 1.28-2.77        | 15/52   | 0.40  | 0.16-1.01 | 0.052 |       |
| 4 <sup>th</sup> Quartile             | 2.78-400.16      | 19/47   | 0.34  | 0.11-1.03 | 0.056 |       |
| <b>Non-Hispanic Whites</b>           |                  |         |       |           |       |       |
| Continuous Quartiles                 | 1.25(0.57-2.45)  | 205/522 | 1.03  | 1.00-1.06 | 0.040 |       |
| 1 <sup>st</sup> Quartile             | 0.05-0.56        | 46/136  | -Ref- |           |       | 0.243 |
| 2 <sup>nd</sup> Quartile             | 0.57-1.25        | 44/138  | 0.67  | 0.35-1.27 | 0.208 |       |

|                                                       |                   |         |       |           |       |       |
|-------------------------------------------------------|-------------------|---------|-------|-----------|-------|-------|
| 3 <sup>rd</sup> Quartile                              | 1.27-2.45         | 47/135  | 0.57  | 0.30-1.06 | 0.075 |       |
| 4 <sup>th</sup> Quartile                              | 2.46-236.77       | 68/113  | 1.38  | 0.81-2.35 | 0.221 |       |
| <b>Non-Hispanic Blacks</b>                            |                   |         |       |           |       |       |
| Continuous Quartiles                                  | 1.27(0.58-2.50)   | 57/207  | 1.00  | 0.99-1.00 | 0.005 |       |
| 1 <sup>st</sup> Quartile                              | 0.05-0.58         | 13/53   | -Ref- |           |       | 0.329 |
| 2 <sup>nd</sup> Quartile                              | 0.59-1.26         | 13/53   | 0.99  | 0.18-5.36 | 0.993 |       |
| 3 <sup>rd</sup> Quartile                              | 1.28-2.45         | 10/56   | 0.93  | 0.25-3.37 | 0.903 |       |
| 4 <sup>th</sup> Quartile                              | 2.55-741.61       | 21/45   | 1.83  | 0.54-6.18 | 0.315 |       |
| <b>Mono-(3-carboxypropyl) phthalate (MCP)</b>         |                   |         |       |           |       |       |
| Continuous Quartiles                                  | 2.02(1.31-3.13)   | 356/993 | 1.00  | 0.98-1.02 | 0.878 |       |
| 1 <sup>st</sup> Quartile                              | 0.09-1.31         | 87/252  | -Ref- |           |       | 0.610 |
| 2 <sup>nd</sup> Quartile                              | 1.32-2.02         | 70/266  | 0.56  | 0.33-0.93 | 0.028 |       |
| 3 <sup>rd</sup> Quartile                              | 2.03-3.12         | 87/250  | 0.73  | 0.45-1.19 | 0.194 |       |
| 4 <sup>th</sup> Quartile                              | 3.14-273.21       | 112/225 | 0.81  | 0.48-1.36 | 0.407 |       |
| <b>Mexican Americans</b>                              |                   |         |       |           |       |       |
| Continuous Quartiles                                  | 1.93(1.26-2.97)   | 70/197  | 0.96  | 0.82-1.14 | 0.648 |       |
| 1 <sup>st</sup> Quartile                              | 0.12-1.26         | 23/44   | -Ref- |           |       | 0.189 |
| 2 <sup>nd</sup> Quartile                              | 1.27-1.91         | 12/56   | 0.29  | 0.09-0.96 | 0.043 |       |
| 3 <sup>rd</sup> Quartile                              | 1.93-2.97         | 15/51   | 0.51  | 0.15-1.77 | 0.275 |       |
| 4 <sup>th</sup> Quartile                              | 3.01-69.90        | 20/46   | 0.45  | 0.15-1.33 | 0.142 |       |
| <b>Non-Hispanic Whites</b>                            |                   |         |       |           |       |       |
| Continuous Quartiles                                  | 2.19(1.44-3.38)   | 205/522 | 1.00  | 0.98-1.02 | 0.729 |       |
| 1 <sup>st</sup> Quartile                              | 0.08-1.43         | 44/138  | -Ref- |           |       | 0.780 |
| 2 <sup>nd</sup> Quartile                              | 1.44-2.19         | 40/142  | 0.65  | 0.35-1.21 | 0.168 |       |
| 3 <sup>rd</sup> Quartile                              | 2.20-3.37         | 52/130  | 0.87  | 0.44-1.75 | 0.695 |       |
| 4 <sup>th</sup> Quartile                              | 3.38-273.20       | 69/112  | 1.03  | 0.48-2.21 | 0.934 |       |
| <b>Non-Hispanic Blacks</b>                            |                   |         |       |           |       |       |
| Continuous Quartiles                                  | 1.72(1.05-2.81)   | 57/207  | 1.00  | 0.97-1.04 | 0.936 |       |
| 1 <sup>st</sup> Quartile                              | 0.11-1.04         | 15/51   | -Ref- |           |       | 0.955 |
| 2 <sup>nd</sup> Quartile                              | 1.05-1.71         | 11/55   | 0.73  | 0.11-4.67 | 0.732 |       |
| 3 <sup>rd</sup> Quartile                              | 1.72-2.80         | 14/52   | 0.64  | 0.23-1.77 | 0.377 |       |
| 4 <sup>th</sup> Quartile                              | 2.81-88.03        | 17/49   | 1.09  | 0.42-2.81 | 0.855 |       |
| <b>Mono-(2-ethyl-5-hydroxyhexyl) phthalate (MEHP)</b> |                   |         |       |           |       |       |
| Continuous Quartiles                                  | 13.86(8.38-26.67) | 356/993 | 1.00  | 0.99-1.00 | 0.816 |       |
| 1 <sup>st</sup> Quartile                              | 0.07-8.38         | 93/245  | -Ref- |           |       | 0.931 |
| 2 <sup>nd</sup> Quartile                              | 8.39-13.86        | 86/251  | 0.71  | 0.39-1.29 | 0.251 |       |
| 3 <sup>rd</sup> Quartile                              | 13.87-26.67       | 94/244  | 0.89  | 0.57-1.38 | 0.580 |       |
| 4 <sup>th</sup> Quartile                              | 26.79-1578.59     | 83/253  | 0.92  | 0.56-1.51 | 0.732 |       |
| <b>Mexican Americans</b>                              |                   |         |       |           |       |       |

|                                                    |                   |         |       |           |       |       |
|----------------------------------------------------|-------------------|---------|-------|-----------|-------|-------|
| Continuous Quartiles                               | 13.13(8.26-22.14) | 70/197  | 1.00  | 0.99-1.01 | 0.581 |       |
| 1 <sup>st</sup> Quartile                           | 0.13-8.25         | 14/53   | -Ref- |           |       |       |
| 2 <sup>nd</sup> Quartile                           | 8.44-13.13        | 17/50   | 1.42  | 0.48-4.18 | 0.507 | 0.639 |
| 3 <sup>rd</sup> Quartile                           | 13.24-22.14       | 19/48   | 1.20  | 0.60-2.38 | 0.590 |       |
| 4 <sup>th</sup> Quartile                           | 22.19-663.83      | 20/46   | 0.82  | 0.34-1.95 | 0.638 |       |
| <b>Non-Hispanic Whites</b>                         |                   |         |       |           |       |       |
| Continuous Quartiles                               | 13.56(8.59-27.20) | 205/522 | 1.00  | 0.99-1.00 | 0.644 |       |
| 1 <sup>st</sup> Quartile                           | 0.22-8.59         | 53/129  | -Ref- |           |       |       |
| 2 <sup>nd</sup> Quartile                           | 8.6-13.55         | 48/134  | 0.66  | 0.32-1.34 | 0.236 | 0.880 |
| 3 <sup>rd</sup> Quartile                           | 13.57-27.2        | 56/126  | 0.93  | 0.51-1.70 | 0.804 |       |
| 4 <sup>th</sup> Quartile                           | 27.59-1578.59     | 48/133  | 0.95  | 0.47-1.94 | 0.891 |       |
| <b>Non-Hispanic Blacks</b>                         |                   |         |       |           |       |       |
| Continuous Quartiles                               | 14.87(7.69-13.24) | 57/207  | 0.99  | 0.98-1.00 | 0.204 |       |
| 1 <sup>st</sup> Quartile                           | 0.07-7.62         | 21/45   | -Ref- |           |       |       |
| 2 <sup>nd</sup> Quartile                           | 7.76-14.83        | 15/51   | 0.58  | 0.24-1.44 | 0.231 | 0.018 |
| 3 <sup>rd</sup> Quartile                           | 14.91-31.14       | 13/53   | 0.44  | 0.14-1.35 | 0.144 |       |
| 4 <sup>th</sup> Quartile                           | 31.33-1212.02     | 8/58    | 0.29  | 0.11-0.75 | 0.013 |       |
| <b>Mono-(2-ethyl-5-oxohexyl) phthalate (MEOHP)</b> |                   |         |       |           |       |       |
| Continuous Quartiles                               | 9.10(5.48-17.01)  | 356/993 | 1.00  | 0.99-1.00 | 0.948 |       |
| 1 <sup>st</sup> Quartile                           | 0.11-5.47         | 85/253  | -Ref- |           |       |       |
| 2 <sup>nd</sup> Quartile                           | 5.48-9.10         | 88/249  | 0.98  | 0.61-1.60 | 0.959 | 0.925 |
| 3 <sup>rd</sup> Quartile                           | 9.11-17.00        | 89/248  | 0.89  | 0.55-1.46 | 0.639 |       |
| 4 <sup>th</sup> Quartile                           | 17.10-1028.15     | 94/243  | 1.06  | 0.70-1.62 | 0.774 |       |
| <b>Mexican Americans</b>                           |                   |         |       |           |       |       |
| Continuous Quartiles                               | 8.67(5.59-14.36)  | 70/197  | 1.00  | 0.99-1.01 | 0.742 |       |
| 1 <sup>st</sup> Quartile                           | 0.22-5.60         | 15/52   | -Ref- |           |       |       |
| 2 <sup>nd</sup> Quartile                           | 5.61-8.69         | 15/52   | 0.85  | 0.36-1.99 | 0.695 | 0.940 |
| 3 <sup>rd</sup> Quartile                           | 8.73-14.35        | 19/48   | 1.51  | 0.71-3.19 | 0.268 |       |
| 4 <sup>th</sup> Quartile                           | 14.36-489.04      | 21/45   | 0.82  | 0.33-2.03 | 0.664 |       |
| <b>Non-Hispanic Whites</b>                         |                   |         |       |           |       |       |
| Continuous Quartiles                               | 9.18(5.58-17.91)  | 205/522 | 1.00  | 0.99-1.00 | 0.536 |       |
| 1 <sup>st</sup> Quartile                           | 0.21-5.56         | 46/136  | -Ref- |           |       |       |
| 2 <sup>nd</sup> Quartile                           | 5.58-9.17         | 52/130  | 0.91  | 0.49-1.68 | 0.756 | 0.852 |
| 3 <sup>rd</sup> Quartile                           | 9.20-17.91        | 56/126  | 0.89  | 0.47-1.71 | 0.727 |       |
| 4 <sup>th</sup> Quartile                           | 17.92-1028.15     | 51/130  | 1.01  | 0.55-2.12 | 0.823 |       |
| <b>Non-Hispanic Blacks</b>                         |                   |         |       |           |       |       |
| Continuous Quartiles                               | 9.35(4.98-17.91)  | 57/207  | 0.99  | 0.98-1.00 | 0.140 |       |
| 1 <sup>st</sup> Quartile                           | 0.11-4.97         | 18/48   | -Ref- |           |       |       |
| 2 <sup>nd</sup> Quartile                           | 5.00-9.31         | 17/49   | 1.26  | 0.42-3.78 | 0.673 | 0.082 |
| 3 <sup>rd</sup> Quartile                           | 9.39-17.69        | 11/55   | 0.45  | 0.11-1.92 | 0.272 |       |

|                                                                      |                    |         |       |            |       |       |
|----------------------------------------------------------------------|--------------------|---------|-------|------------|-------|-------|
| 4 <sup>th</sup> Quartile                                             | 18.12-293.53       | 11/55   | 0.53  | 0.20-1.43  | 0.201 |       |
| <b>Mono-isobutyl phthalate (MiBP)</b>                                |                    |         |       |            |       |       |
| Continuous Quartiles                                                 | 2.47(1.41-4.33)    | 356/993 | 1.00  | 0.99-1.01  | 0.722 |       |
| 1 <sup>st</sup> Quartile                                             | 0.06-1.41          | 82/258  | -Ref- |            |       | 0.898 |
| 2 <sup>nd</sup> Quartile                                             | 1.42-2.47          | 92/243  | 1.11  | 0.60-2.05  | 0.724 |       |
| 3 <sup>rd</sup> Quartile                                             | 2.48-4.33          | 87/250  | 1.00  | 0.59-1.69  | 0.997 |       |
| 4 <sup>th</sup> Quartile                                             | 4.34-123.93        | 95/242  | 1.03  | 0.69-1.54  | 0.868 |       |
| <b>Mexican Americans</b>                                             |                    |         |       |            |       |       |
| Continuous Quartiles                                                 | 2.98(1.52-5.30)    | 70/197  | 1.02  | 0.97-1.06  | 0.437 |       |
| 1 <sup>st</sup> Quartile                                             | 0.13-1.52          | 18/49   | -Ref- |            |       | 0.112 |
| 2 <sup>nd</sup> Quartile                                             | 1.53-2.98          | 21/46   | 0.99  | 0.35-2.87  | 0.992 |       |
| 3 <sup>rd</sup> Quartile                                             | 3.00-5.30          | 15/52   | 0.66  | 0.27-1.63  | 0.354 |       |
| 4 <sup>th</sup> Quartile                                             | 5.34-123.93        | 16/50   | 0.51  | 0.16-1.57  | 0.228 |       |
| <b>Non-Hispanic Whites</b>                                           |                    |         |       |            |       |       |
| Continuous Quartiles                                                 | 2.11(1.23-3.53)    | 205/522 | 1.00  | 0.97-1.02  | 0.720 |       |
| 1 <sup>st</sup> Quartile                                             | 0.12-1.22          | 50/132  | -Ref- |            |       | 0.660 |
| 2 <sup>nd</sup> Quartile                                             | 1.23-2.10          | 51/132  | 1.23  | 0.70-2.15  | 0.454 |       |
| 3 <sup>rd</sup> Quartile                                             | 2.11-3.53          | 48/133  | 1.16  | 0.56-2.42  | 0.679 |       |
| 4 <sup>th</sup> Quartile                                             | 3.54-103.62        | 56/125  | 0.89  | 0.58-1.35  | 0.564 |       |
| <b>Non-Hispanic Blacks</b>                                           |                    |         |       |            |       |       |
| Continuous Quartiles                                                 | 2.98(1.78-5.02)    | 57/207  | 1.06  | 0.99-1.15  | 0.109 |       |
| 1 <sup>st</sup> Quartile                                             | 0.06-1.76          | 14/52   | -Ref- |            |       | 0.150 |
| 2 <sup>nd</sup> Quartile                                             | 1.80-2.95          | 11/55   | 0.42  | 0.10-1.77  | 0.229 |       |
| 3 <sup>rd</sup> Quartile                                             | 3.00-5.00          | 14/52   | 1.83  | 0.47-7.06  | 0.368 |       |
| 4 <sup>th</sup> Quartile                                             | 5.04-61.66         | 18/48   | 2.16  | 0.47-10.02 | 0.312 |       |
| <b>Mono-2-ethyl-5-carboxypentyl phthalate (MECPP) (NHANES 03-04)</b> |                    |         |       |            |       |       |
| Continuous Quartiles                                                 | 21.95(13.39-43)    | 182/451 | 1.00  | 0.99-1.00  | 0.896 |       |
| 1 <sup>st</sup> Quartile                                             | 0.06-13.38         | 37/122  | -Ref- |            |       | 0.974 |
| 2 <sup>nd</sup> Quartile                                             | 13.44-21.95        | 44/114  | 1.15  | 0.54-2.48  | 0.700 |       |
| 3 <sup>rd</sup> Quartile                                             | 22.04-43.00        | 51/107  | 0.89  | 0.50-1.59  | 0.682 |       |
| 4 <sup>th</sup> Quartile                                             | 43.50-1303.78      | 50/108  | 1.09  | 0.54-2.21  | 0.791 |       |
| <b>Mexican Americans</b>                                             |                    |         |       |            |       |       |
| Continuous Quartiles                                                 | 22.48(14.47-35.35) | 35/90   | 1.00  | 0.99-1.01  | 0.812 |       |
| 1 <sup>st</sup> Quartile                                             | 1.01-14.46         | 7/25    | -Ref- |            |       | 0.580 |
| 2 <sup>nd</sup> Quartile                                             | 14.51-22.48        | 6/25    | 0.91  | 0.30-2.76  |       |       |
| 3 <sup>rd</sup> Quartile                                             | 23.20-35.35        | 9/22    | 1.26  | 0.28-5.73  |       |       |
| 4 <sup>th</sup> Quartile                                             | 35.45-1119.5       | 13/18   | 1.65  | 0.19-14.57 |       |       |
| <b>Non-Hispanic Whites</b>                                           |                    |         |       |            |       |       |
| Continuous                                                           | 22.55(14.81-47.05) | 112/232 | 1.00  | 0.99-1.00  | 0.360 |       |

|                          |                    |       |       |            |       |       |
|--------------------------|--------------------|-------|-------|------------|-------|-------|
| Quartiles                |                    |       |       |            |       |       |
| 1 <sup>st</sup> Quartile | 1.86-14.80         | 21/65 | -Ref- |            |       |       |
| 2 <sup>nd</sup> Quartile | 14.81-22.50        | 28/58 | 0.96  | 0.30-3.06  | 0.935 | 0.549 |
| 3 <sup>rd</sup> Quartile | 22.59-46.82        | 33/53 | 0.80  | 0.37-1.71  | 0.536 |       |
| 4 <sup>th</sup> Quartile | 47.28-1030.78      | 30/56 | 0.76  | 0.20-2.91  | 0.667 |       |
| Non-Hispanic Blacks      |                    |       |       |            |       |       |
| Continuous               | 19.30(10.10-37.03) | 26/94 | 1.00  | 0.98-1.01  | 0.573 |       |
| Quartiles                |                    |       |       |            |       |       |
| 1 <sup>st</sup> Quartile | 0.06-9.96          | 9/21  | -Ref- |            |       |       |
| 2 <sup>nd</sup> Quartile | 10.22-19.28        | 8/22  | 3.42  | 0.11-109.8 | 0.460 | 0.352 |
| 3 <sup>rd</sup> Quartile | 19.31-36.62        | 6/24  | 0.16  | 0.00-5.35  | 0.280 |       |
| 4 <sup>th</sup> Quartile | 37.43-502.18       | 3/27  | 1.83  | 0.16-21.07 | 0.604 |       |

<sup>b</sup>Erectile dysfunction was defined as “sometimes” or “never” able to maintain an erection for satisfactory sexual intercourse.

<sup>†</sup>Adjusted for age, race/ethnicity (only in total population), physical activity (vigorous and moderate), smoking status, education, obesity, diabetes and urinary creatinine.
